# Supplementary material for: Hydrothermal synthesis of stamen-like LiMnPO4nanostructures self-assembled with [001]-oriented nanorods and their application in Li-ion batteries
Source: Royal Society of Chemistry journal article supplement (doi:10.1039/c6ce00056h), 2016-01-01
Supplement: c6ce00056h1.pdf [file c6ce00056h1.pdf]

## Supplementary Information

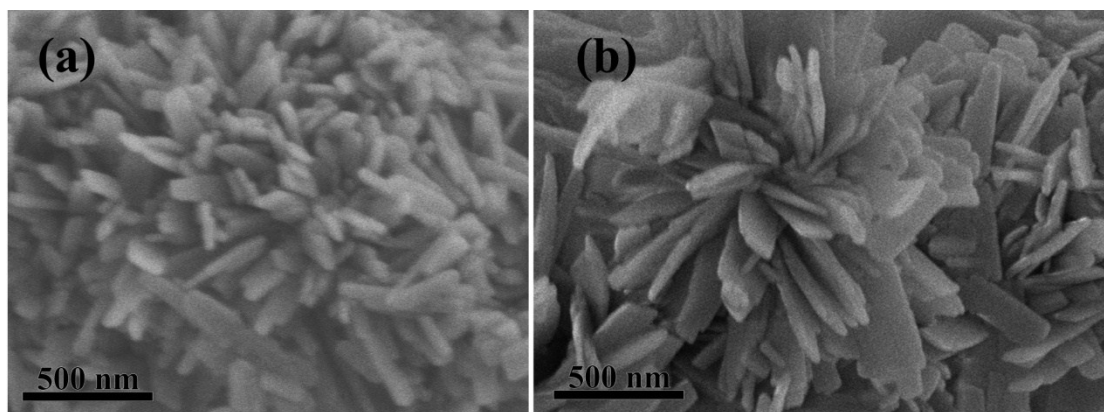

Figure S1 SEM images of (a) the hydrothermally synthesized LiMnPO<sub>4</sub> samples under the effect of 0.21 g KOH and 0.4 g K<sub>2</sub>SO<sub>4</sub>, and (b) hydrothermally synthesized flower-like LiMnPO<sub>4</sub> nanostructures self-assembled by nanosheets under the effect of 0.21 g KOH without any K<sub>2</sub>SO<sub>4</sub>. Due to the fast bounding of K<sup>+</sup> ion on (100) planes, the growth along the [100] direction is also strongly suppressed, and the primary LiMnPO<sub>4</sub> blocks change from (010) nanosheets to [001] rod-like nanoplates.

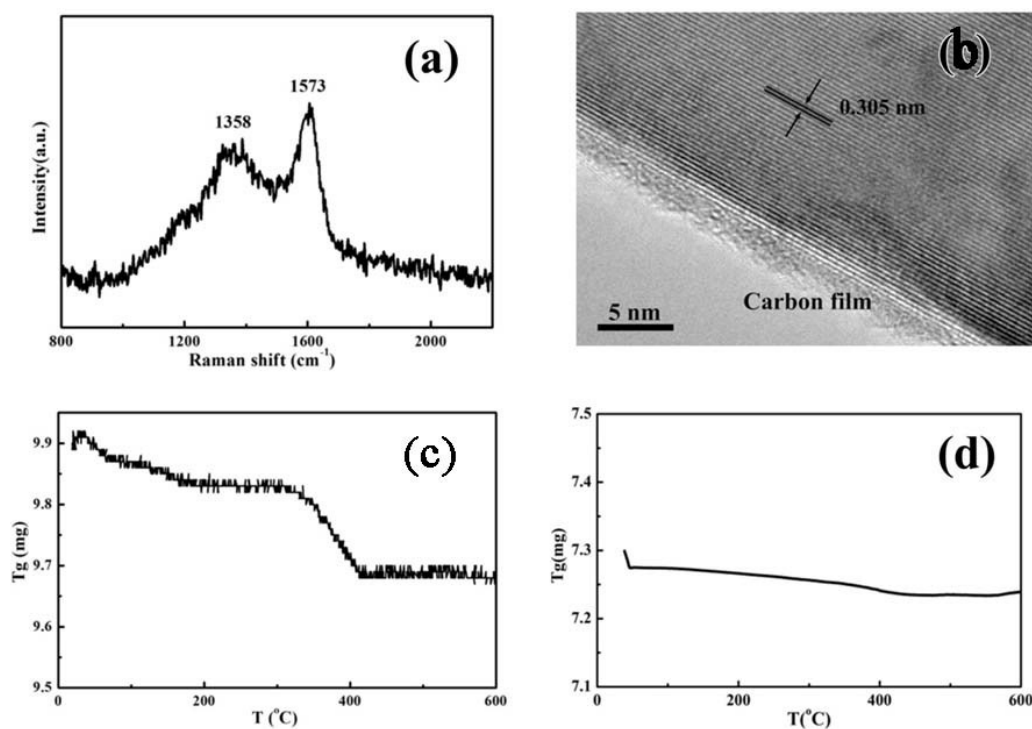

Figure S2 (a) Raman spectra, (b) HRTEM image, and (c) TG curve of the carbon-coated stamen-like LiMnPO<sub>4</sub> nanostructures, and (d) TG curve of the stamen-like LiMnPO<sub>4</sub> nanostructures before carbon coated
